# Supplementary material for: Safety, Pharmacokinetics, Pharmacodynamics, and Antitumor Activity from a Phase I Study of Simlukafusp Alfa (FAP-IL2v) in Advanced/Metastatic Solid Tumors
Source: PubMed Central journal article supplement — Clin Cancer Res. 2024 Apr 17;30(13):2693–701. doi: 10.1158/1078-0432.CCR-23-3567 (PMC11215403; doi:10.1158/1078-0432.ccr-23-3567), 2024-04-17
Supplement: ccr-23-3567_supplementary_figure_s1_suppfs1.pdf [file ccr-23-3567_supplementary_figure_s1_suppfs1.pdf]

Supplementary Figure S1. Study design.

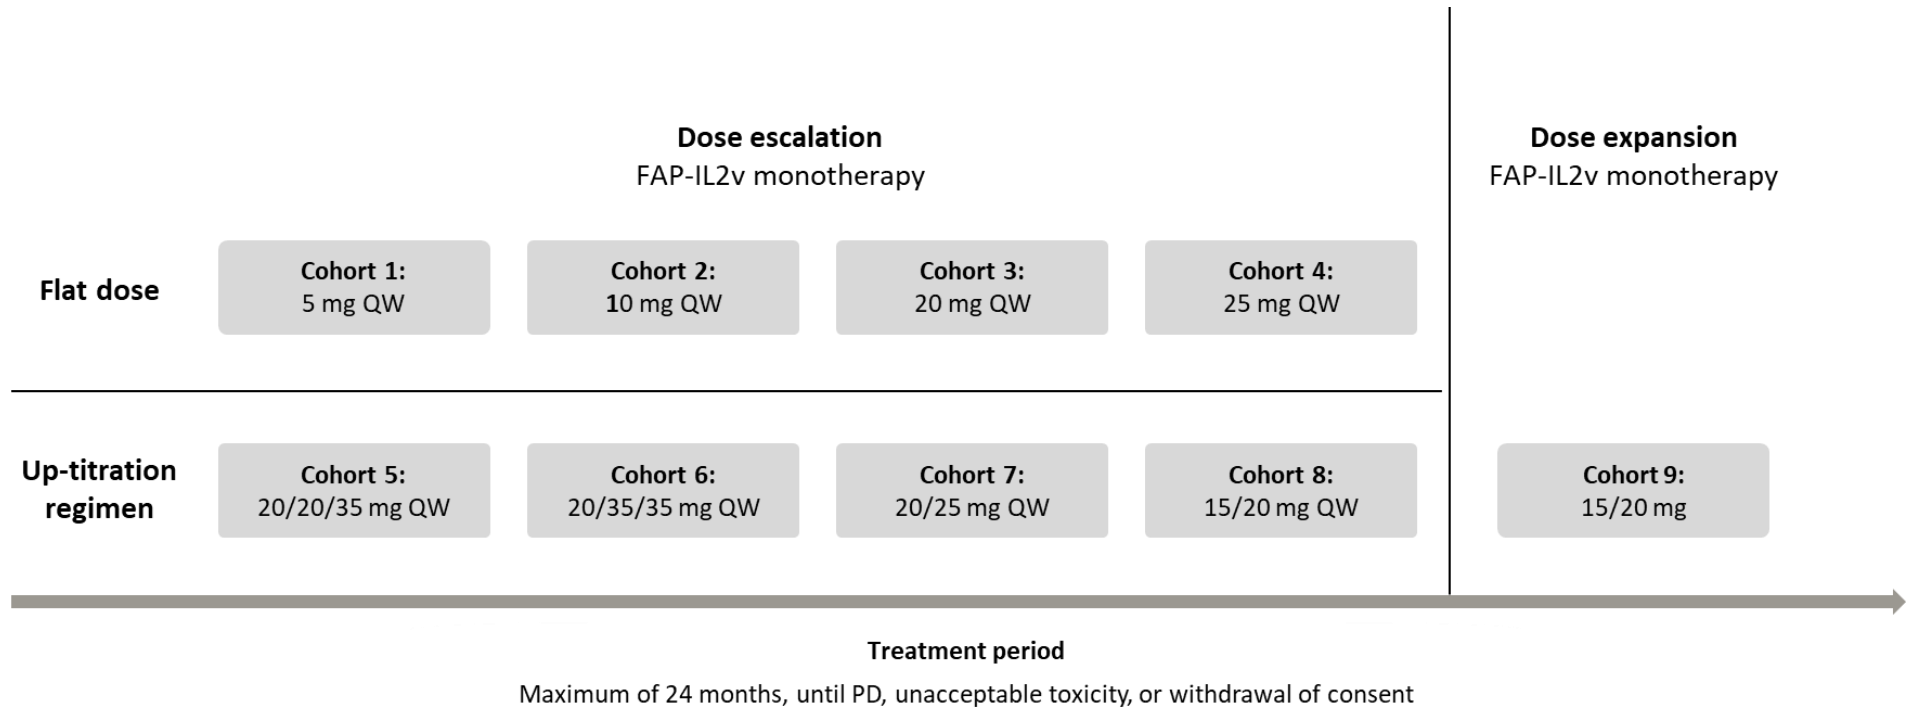

FAP-IL2v, fibroblast activation protein- $\alpha$  interleukin-2 variant; PD, progressive disease; QW, weekly.
