# Supplementary material for: Safety, Pharmacokinetics, Pharmacodynamics, and Antitumor Activity from a Phase I Study of Simlukafusp Alfa (FAP-IL2v) in Advanced/Metastatic Solid Tumors
Source: PubMed Central journal article supplement — Clin Cancer Res. 2024 Apr 17;30(13):2693–701. doi: 10.1158/1078-0432.CCR-23-3567 (PMC11215403; doi:10.1158/1078-0432.ccr-23-3567), 2024-04-17
Supplement: ccr-23-3567_supplementary_table_s2_suppts2.pdf [file ccr-23-3567_supplementary_table_s2_suppts2.pdf]

**Supplementary Table S2.** Most frequent any-grade AEs ( $\geq 20\%$ ) across all doses and combined.

| Patients with $\geq 1$ AE, n (%) | FAP-IL2v once weekly dosing  |                               |                               |                               |                                        |                                        |                                  |                                   |                                   |                                    |
|----------------------------------|------------------------------|-------------------------------|-------------------------------|-------------------------------|----------------------------------------|----------------------------------------|----------------------------------|-----------------------------------|-----------------------------------|------------------------------------|
|                                  | Flat dosing                  |                               |                               |                               | In-patient up-titration                |                                        |                                  |                                   | Expansion                         | Combined                           |
|                                  | Cohort 1:<br>5 mg<br>(n = 3) | Cohort 2:<br>10 mg<br>(n = 4) | Cohort 3:<br>20 mg<br>(n = 4) | Cohort 4:<br>25 mg<br>(n = 5) | Cohort 5:<br>20/20/35<br>mg<br>(n = 5) | Cohort 6:<br>20/35/35<br>mg<br>(n = 1) | Cohort 7:<br>20/25 mg<br>(n = 5) | Cohort 8:<br>15/20 mg<br>(n = 11) | Cohort 9:<br>15/20 mg<br>(n = 23) | All Part A<br>patients<br>(N = 61) |
| All-grade AEs                    | 3 (100.0)                    | 4 (100.0)                     | 4 (100.0)                     | 5 (100.0)                     | 5 (100.0)                              | 1 (100.0)                              | 5 (100.0)                        | 11 (100.0)                        | 23 (100.0)                        | 61 (100.0)                         |
| Pyrexia                          | 3 (100.0)                    | 2 (50.0)                      | 2 (50.0)                      | 5 (100.0)                     | 4 (80.0)                               | 0                                      | 2 (40.0)                         | 7 (63.6)                          | 18 (78.3)                         | 43 (70.5)                          |
| Chills                           | 1 (33.3)                     | 1 (25.0)                      | 2 (50.0)                      | 2 (40.0)                      | 2 (40.0)                               | 0                                      | 1 (20.0)                         | 5 (45.5)                          | 15 (65.2)                         | 29 (47.5)                          |
| Fatigue                          | 1 (33.3)                     | 1 (25.0)                      | 2 (50.0)                      | 2 (40.0)                      | 2 (40.0)                               | 1 (100.0)                              | 2 (40.0)                         | 5 (45.5)                          | 11 (47.8)                         | 27 (44.3)                          |
| Asthenia                         | 0                            | 1 (25.0)                      | 2 (50.0)                      | 3 (60.0)                      | 0                                      | 0                                      | 0                                | 4 (36.4)                          | 13 (56.5)                         | 23 (37.7)                          |
| Edema peripheral                 | 2 (66.7)                     | 0                             | 0                             | 3 (60.0)                      | 1 (20.0)                               | 0                                      | 1 (20.0)                         | 5 (45.5)                          | 7 (30.4)                          | 19 (31.1)                          |
| Nausea                           | 2 (66.7)                     | 2 (50.0)                      | 2 (50.0)                      | 2 (40.0)                      | 3 (60.0)                               | 0                                      | 2 (40.0)                         | 4 (36.4)                          | 13 (56.5)                         | 30 (49.2)                          |
| Diarrhea                         | 1 (33.3)                     | 0                             | 1 (25.0)                      | 3 (60.0)                      | 3 (60.0)                               | 1 (100.0)                              | 1 (20.0)                         | 4 (36.4)                          | 6 (26.1)                          | 20 (32.8)                          |
| Constipation                     | 2 (66.7)                     | 1 (25.0)                      | 2 (50.0)                      | 0                             | 2 (40.0)                               | 0                                      | 2 (40.0)                         | 4 (36.4)                          | 6 (26.1)                          | 19 (31.1)                          |
| Vomiting                         | 1 (33.3)                     | 0                             | 1 (25.0)                      | 1 (20.0)                      | 2 (40.0)                               | 0                                      | 1 (20.0)                         | 3 (27.3)                          | 10 (43.5)                         | 19 (31.1)                          |
| Infusion-related reaction        | 2 (66.7)                     | 2 (50.0)                      | 2 (50.0)                      | 3 (60.0)                      | 5 (100.0)                              | 1 (100.0)                              | 4 (80.0)                         | 8 (72.7)                          | 14 (60.9)                         | 41 (67.2)                          |
| Decreased appetite               | 2 (66.7)                     | 1 (25.0)                      | 3 (75.0)                      | 1 (20.0)                      | 2 (40.0)                               | 0                                      | 3 (60.0)                         | 7 (63.6)                          | 6 (26.1)                          | 25 (41.0)                          |
| AST increased                    | 1 (33.3)                     | 1 (25.0)                      | 0                             | 2 (40.0)                      | 2 (40.0)                               | 1 (100.0)                              | 1 (20.0)                         | 1 (9.1)                           | 7 (30.4)                          | 16 (26.2)                          |
| ALT increased                    | 1 (33.3)                     | 1 (25.0)                      | 0                             | 2 (40.0)                      | 1 (20.0)                               | 1 (100.0)                              | 0                                | 1 (9.1)                           | 7 (30.4)                          | 14 (23.0)                          |
| Blood bilirubin increased        | 0                            | 0                             | 1 (25.0)                      | 1 (20.0)                      | 2 (40.0)                               | 0                                      | 0                                | 4 (36.4)                          | 6 (26.1)                          | 14 (23.0)                          |
| Cough                            | 0                            | 0                             | 1 (25.0)                      | 0                             | 1 (20.0)                               | 0                                      | 1 (20.0)                         | 5 (45.5)                          | 6 (26.1)                          | 14 (23.0)                          |
| Dyspnea                          | 0                            | 0                             | 0                             | 0                             | 4 (80.0)                               | 0                                      | 1 (20.0)                         | 3 (27.3)                          | 5 (21.7)                          | 13 (21.3)                          |
| Rash                             | 1 (33.3)                     | 1 (25.0)                      | 1 (25.0)                      | 2 (40.0)                      | 1 (20.0)                               | 0                                      | 0                                | 3 (27.3)                          | 4 (17.4)                          | 13 (21.3)                          |
| Anemia                           | 0                            | 0                             | 0                             | 1 (20.0)                      | 2 (40.0)                               | 0                                      | 2 (40.0)                         | 5 (45.5)                          | 7 (30.4)                          | 17 (27.9)                          |

AE, adverse event; ALT, alanine transaminase; AST, aspartate transaminase; FAP-IL2v, fibroblast activation protein- $\alpha$  interleukin-2 variant.
